# Supplementary material for: Preliminary 19F-MRS Study of Tumor Cell Proliferation with 3′-deoxy-3′-fluorothymidine and Its Metabolite (FLT-MP)
Source: PubMed Central journal article supplement (PMC5634584; doi:10.1155/2017/3981358), 2017-09-26
Supplement: 3981358.f1.pdf [file 3981358.f1.pdf]

Supplementary Information

**Preliminary  $^{19}\text{F}$ -MRS Study of Tumor Cell Proliferation with 3'-deoxy-3'-fluorothymidine (FLT) and its metabolite (FLT-MP)**

*In Ok Ko,<sup>†, \*</sup> Ki-Hye Jung,<sup>†</sup> Mi Hyun Kim,<sup>†</sup> Kyeong Jun Kang,<sup>†</sup> Kyo Chul Lee,<sup>†</sup> Kyeong*

*Min Kim,<sup>‡</sup> Insup Noh,<sup>§</sup> Yong Jin Lee,<sup>†</sup> Sang Moo Lim,<sup>//</sup> Jung Young Kim,<sup>†, \*</sup> Ji-Ae Park,<sup>†, \*</sup>*

<sup>†</sup> Division of RI-Convergence Research, Korea Institute of Radiological & Medical Sciences, Seoul, Korea; <sup>\*</sup> Convergence Institute of Biomedical Eng. and Biomaterials, Seoul National Univ. of Sci. & Tech., Seoul, Korea; <sup>‡</sup> Division of Medical Radiation Equipment, Korea Institute of Radiological & Medical Sciences, Seoul, Korea; <sup>§</sup> Department of Chemical & Biomolecular Eng., Seoul National Univ. of Sci. & Tech., Seoul, Korea; <sup>//</sup> Department of Nuclear Medicine, Korea Institute of Radiological & Medical Science, Seoul, Korea.

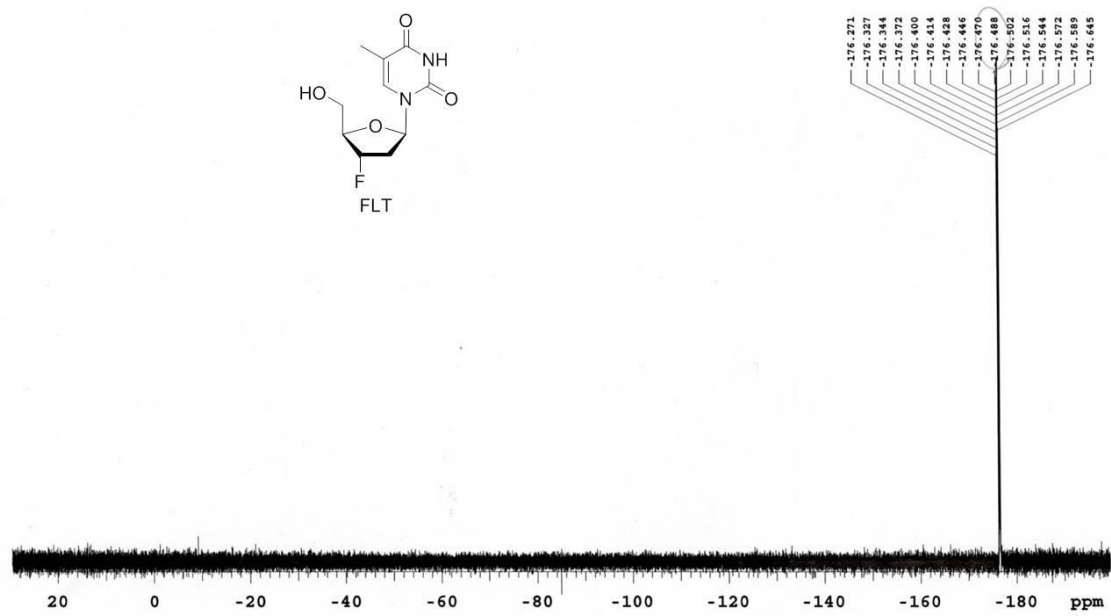

Figure S1.  $^{19}\text{F}$  NMR spectrum of FLT

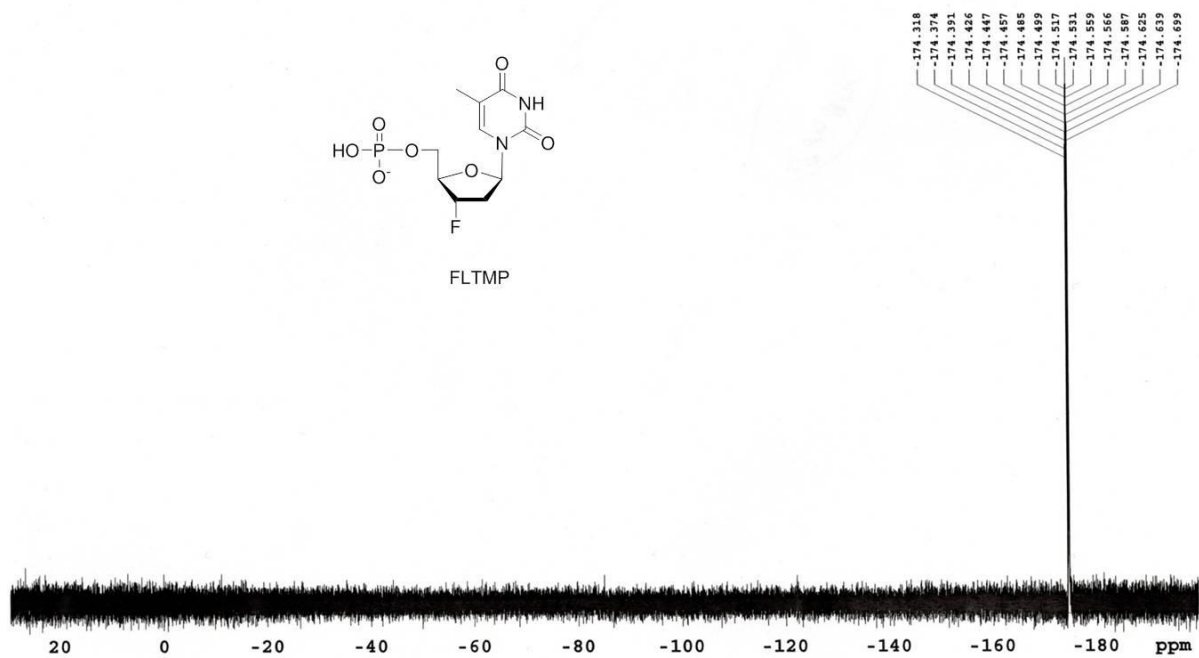

Figure S2.  $^{19}\text{F}$  NMR spectrum of FLT-MP.

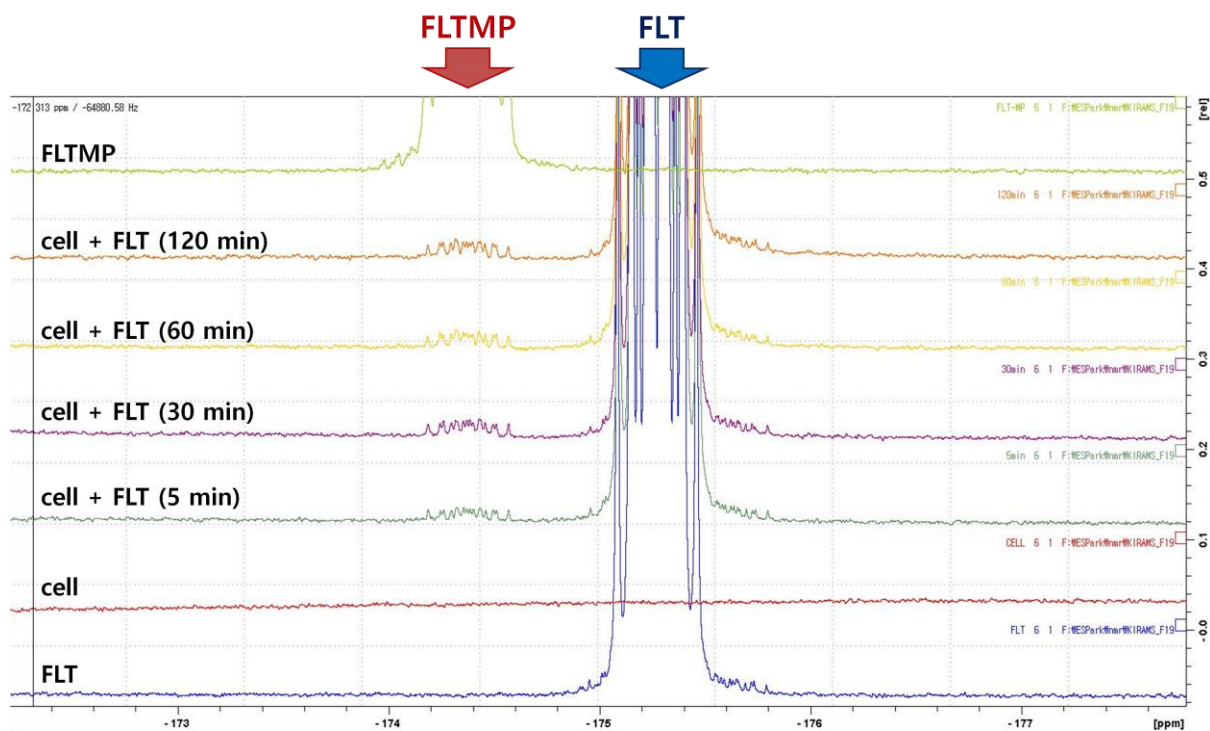

Figure S3.  $^{19}\text{F}$  NMR spectra of MCF-7 cells treated with FLT as a function of time. The formation of the FLT-MP signal caused by metabolism of FLT was observed at -174.5 ppm.

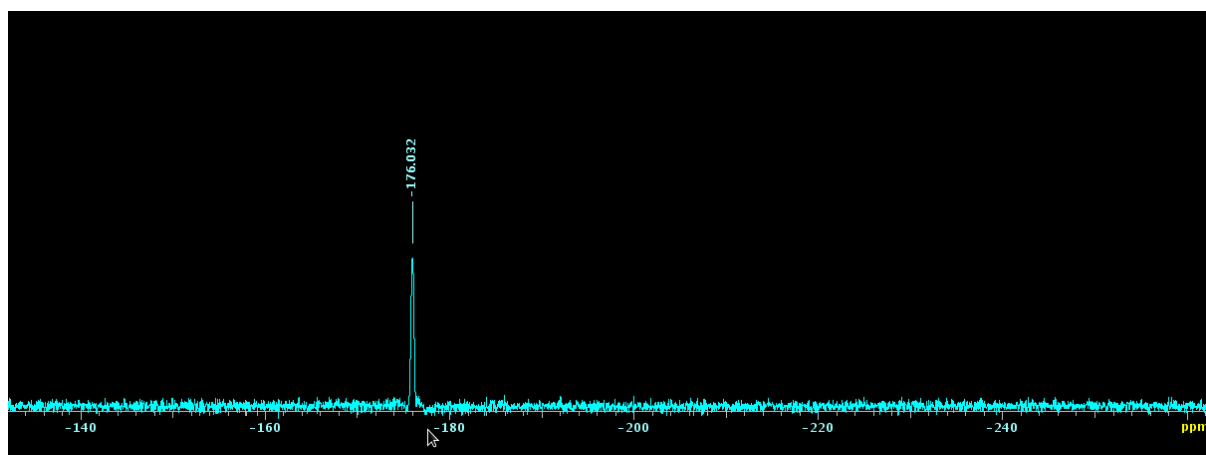

Figure S4.  $^{19}\text{F}$  MRS of MCF-7 cells treated with FLT.
